# Supplementary material
Source: PubMed Central journal article supplement (PMC6990137)
Supplement: NIHMS1547552-supplement-1.pdf [file NIHMS1547552-supplement-1.pdf]

494 **Supplemental Table 1:** Cardiovascular diagnosis according to planned mode of delivery

| <b>Disease</b>                               | <b>Total<br/>(N=276)</b> | <b>Planned<br/>Vaginal<br/>Birth<br/>(n=210)</b> | <b>Planned<br/>Cesarean<br/>Delivery<br/>(n=66)</b> |
|----------------------------------------------|--------------------------|--------------------------------------------------|-----------------------------------------------------|
| <b>Congenital</b>                            | 189 (68.5)               | 146 (69.5)                                       | 43 (65.2)                                           |
| Shunts                                       | 55 (19.9)                | 45 (21.4)                                        | 10 (15.2)                                           |
| Atrial Septal Defect                         | 24 (8.7)                 | 22 (10.5)                                        | 2 (3.0)                                             |
| Anomalous Pulmonary Venous Return            | 6 (2.2)                  | 6 (2.8)                                          | 0 (0)                                               |
| Atrioventricular Canal                       | 8 (2.9)                  | 4 (1.9)                                          | 4 (6.1)                                             |
| Ventricular Septal Defect                    | 14 (5.1)                 | 11 (5.2)                                         | 3 (4.5)                                             |
| Patent Ductus Arteriosus                     | 3 (1.1)                  | 2 (0.95)                                         | 1 (1.5)                                             |
| Right Heart Lesions                          | 42 (15.2)                | 33 (15.7)                                        | 9 (13.6)                                            |
| Tetralogy of Fallot                          | 27 (9.8)                 | 22 (10.5)                                        | 5 (7.6)                                             |
| Pulmonic Stenosis                            | 12 (4.3)                 | 9 (4.3)                                          | 3 (4.5)                                             |
| Double chamber right ventricle               | 1 (0.36)                 | 1 (0.48)                                         | 0 (0)                                               |
| Pulmonary atresia, intact ventricular septum | 2 (0.72)                 | 1 (0.48)                                         | 1 (1.5)                                             |
| Ebstein                                      | 5 (1.8)                  | 2 (0.95)                                         | 3 (4.5)                                             |
| Coarctation                                  | 26 (9.4)                 | 23 (11.0)                                        | 3 (4.5)                                             |
| Malposed Great Arteries                      | 18 (6.5)                 | 16 (7.6)                                         | 2 (3.0)                                             |
| D-loop Transposition, Atrial switch          | 7 (2.5)                  | 7 (3.3)                                          | 0 (0)                                               |
| D-loop Transposition, Arterial switch        | 1 (0.36)                 | 1 (0.48)                                         | 0 (0)                                               |
| D-loop Transposition, Rastelli               | 4 (1.4)                  | 3 (1.4)                                          | 1 (1.5)                                             |

|                             |          |          |           |
|-----------------------------|----------|----------|-----------|
| L-loop Transposition        | 6 (2.2)  | 5 (2.4)  | 1 (1.5)   |
| Truncus Arteriosus          | 5 (1.8)  | 3 (1.4)  | 2 (3.0)   |
| Single Ventricle            | 5 (1.8)  | 3 (1.4)  | 2 (3.0)   |
| L-loop Transposition        | 3 (1.1)  | 2 (0.95) | 1 (1.5)   |
| Double Inlet Left Ventricle | 1 (0.36) | 0 (0)    | 1 (1.5)   |
| Heterotaxy                  | 1 (0.36) | 1 (0.48) | 0 (0)     |
| <b>Congenital Valvular</b>  | 26 (9.4) | 14 (6.7) | 12 (18.2) |
| Aortic Stenosis             | 9 (3.3)  | 4 (1.9)  | 5 (7.6)   |
| Bicuspid Aortic Valve       | 15 (5.4) | 8 (3.8)  | 7 (10.6)  |
| Aortic Regurgitation        | 1 (0.36) | 1 (0.48) | 0 (0)     |
| Subaortic Stenosis          | 1 (0.36) | 1 (0.48) | 0 (0)     |
| Other                       | 7 (2.5)  | 7 (2.5)  | 0 (0)     |
| Left Pulmonary Artery Sling | 2 (0.72) | 2 (0.95) | 0 (0)     |
| Double Aortic Arch          | 1 (0.36) | 1 (0.48) | 0 (0)     |
| Arterial Tortuosity         | 2 (0.72) | 2 (0.95) | 0 (0)     |
| Anomalous Coronary          | 2 (0.72) | 2 (0.95) | 0 (0)     |
| <b>Connective Tissue</b>    | 25 (9.1) | 18 (8.6) | 7 (10.6)  |
| Ehlers-Danlos Syndrome      | 1 (0.36) | 1 (0.48) | 0 (0)     |
| Loeys-Dietz Syndrome        | 6 (2.2)  | 5 (2.4)  | 1 (1.5)   |
| Marfan Syndrome             | 12 (4.3) | 8 (3.8)  | 4 (6.1)   |
| Other                       | 6 (2.2)  | 4 (1.9)  | 2 (3.0)   |
| <b>Cardiomyopathy</b>       | 22 (8.0) | 16 (7.6) | 6 (9.1)   |
| <b>Acquired Valvular</b>    | 4 (1.4)  | 2 (0.95) | 2 (3.0)   |

|                              |           |           |         |
|------------------------------|-----------|-----------|---------|
| Aortic Stenosis              | 1 (0.36)  | 0 (0)     | 1 (1.5) |
| Mitral Stenosis              | 2 (0.72)  | 2 (0.95)  | 0 (0)   |
| Mitral Regurgitation         | 1 (0.36)  | 0 (0)     | 1 (1.5) |
| <b>Vascular</b>              | 5 (1.8)   | 3 (1.4)   | 2 (3.0) |
| Kawasaki Disease             | 2 (0.72)  | 1 (0.48)  | 1 (1.5) |
| Takayasu Arteritis           | 2 (0.72)  | 1 (0.48)  | 1 (1.5) |
| Coronary Artery Dissection   | 1 (0.36)  | 1 (0.48)  | 0 (0)   |
| <b>Arrhythmia</b>            | 31 (11.2) | 25 (11.9) | 6 (9.1) |
| Supraventricular Tachycardia | 16 (5.8)  | 12 (5.8)  | 4 (6.1) |
| Ventricular Tachycardia      | 6 (2.2)   | 4 (1.9)   | 2 (3.0) |
| Heart Block/Bradycardia      | 4 (1.4)   | 4 (1.9)   | 0 (0)   |
| Atrial Fibrillation          | 3 (1.1)   | 3 (1.4)   | 0 (0)   |
| Other Arrhythmia             | 2 (0.72)  | 2 (0.95)  | 0 (0)   |

495

496
